# Supplementary material for: Size-, shape-, facet- and support-dependent selectivity of Cu nanoparticles in CO2 reduction through multiparameter optimization
Source: Royal Society of Chemistry journal article supplement (doi:10.1039/d4nr03567d), 2024-12-11
Supplement: d4nr03567d1.pdf [file d4nr03567d1.pdf]

## SUPPORTING INFORMATION

### Size, Shape, Facet and Support Dependent Selectivity of Cu nanoparticles in CO<sub>2</sub> reduction through multiparameter optimization

Anjana Tripathi<sup>a</sup>, Ranjit Thapa<sup>a,b\*</sup>

<sup>a</sup>Department of Physics, SRM University AP, Amaravati 522 240 Andhra Pradesh, India

<sup>a,b</sup>Centre for Computational and Integrative Sciences, SRM University – AP, Amaravati 522  
240, Andhra Pradesh, India

\*Corresponding Author: [ranjit.phy@gmail.com](mailto:ranjit.phy@gmail.com)

| S.No | Surface                  | G*COOH | G*CO  | G*CHO | G(C1)<br>(G*CHO-<br>G*CO) | G(C2)<br>(G*2CO)-<br>(G*COOH) | Favorable<br>pathway |
|------|--------------------------|--------|-------|-------|---------------------------|-------------------------------|----------------------|
| 1    | Cu111                    | 0.38   | -0.04 | 0.63  | 0.67                      | 0.73                          | C1                   |
| 2    | Cu100                    | 0.35   | -0.05 | 0.60  | 0.65                      | 0.49                          | C2                   |
| 3    | Cu13                     | 0.09   | -0.39 | 0.29  | 0.68                      | 0.74                          | C1                   |
| 4    | Cu38(100)                | 0.22   | 0.45  | 0.51  | 0.06                      | 0.77                          | C1                   |
| 5    | Cu38(111)                | 0.50   | 0.01  | 0.63  | 0.62                      | 0.51                          | C2                   |
| 6    | Cu55(100)                | 0.22   | -0.09 | 0.44  | 0.53                      | 0.42                          | C2                   |
| 7    | Cu55(111)                | 0.15   | -0.02 | 0.39  | 0.41                      | 0.68                          | C1                   |
| 8    | Cu79(100)                | -0.32  | -0.54 | 0.17  | 0.71                      | 0.55                          | C2                   |
| 9    | Cu79(111)                | 0.01   | -0.38 | 0.31  | 0.69                      | 0.59                          | C2                   |
| 10   | Cu140(100)               | -0.40  | -0.75 | -0.10 | 0.65                      | 0.66                          | C1                   |
| 11   | Cu140(111)               | -0.11  | -0.37 | 0.13  | 0.5                       | 0.69                          | C1                   |
| 12   | Cu147(100)               | -0.16  | 0.15  | 0.11  | -0.04                     | 0.51                          | C1                   |
| 13   | Cu147(111)               | -0.37  | 0.13  | 0.66  | 0.53                      | 0.62                          | C1                   |
| 14   | Cu13(Ico)                | -0.83  | -0.68 | -0.56 | 0.12                      | 1.2                           | C1                   |
| 15   | Cu55(Ico)                | 0.38   | -0.04 | 0.58  | 0.62                      | 0.86                          | C1                   |
| 16   | Cu147(Ico)               | 0.31   | 0.05  | 0.56  | 0.51                      | 0.83                          | C1                   |
| 17   | Cu <sub>38</sub> /3BGr   | 0.43   | 0.25  | 0.78  | 0.53                      | 0.64                          | C1                   |
| 18   | Cu <sub>79</sub> /BGr    | 0.33   | -0.01 | 0.55  | 0.56                      | 0.97                          | C1                   |
| 19   | Cu <sub>38</sub> /DVG    | 0.48   | 0.35  | 0.50  | 0.15                      | 0.22                          | C1                   |
| 20   | Cu <sub>79</sub> /DVG    | 0.33   | -0.03 | 0.23  | 0.26                      | 1.08                          | C1                   |
| 21   | Cu <sub>55</sub> /DVG    | 0.33   | -0.07 | 0.64  | 0.71                      | 0.90                          | C1                   |
| 22   | Cu <sub>79</sub> /BDVG   | 0.47   | 0.01  | 0.32  | 0.31                      | 1.10                          | C1                   |
| 23   | Cu <sub>147</sub> /BDVG  | 0.33   | 0.11  | 0.66  | 0.55                      | 0.71                          | C1                   |
| 24   | Cu <sub>55</sub> /NDVG   | 0.28   | -0.07 | 0.53  | 0.60                      | 0.62                          | C1                   |
| 25   | Cu <sub>55</sub> /2NDVG  | -3.43  | -0.08 | -3.05 | -2.97                     | -2.72                         | C2                   |
| 26   | Cu <sub>147</sub> /2NDVG | 0.26   | 0.11  | 0.63  | 0.52                      | 0.66                          | C1                   |
| 27   | Cu38/2SO <sub>2</sub>    | 0.46   | 0.40  | 0.78  | 0.38                      | 0.18                          | C2                   |
| 28   | Cu55/2SO <sub>2</sub>    | -3.76  | -0.14 | 0.46  | 0.60                      | 0.71                          | C1                   |
| 29   | Cu79/2SO <sub>2</sub>    | 0.44   | 0.11  | 0.65  | 0.54                      | 0.49                          | C2                   |
| 30   | Cu140/2SO <sub>2</sub>   | 0.53   | 0.25  | 0.75  | 0.50                      | 0.58                          | C1                   |

**Table S1.** Gibbs free energy ( $\Delta G^*_{\text{COOH}}$ ,  $\Delta G^*_{\text{CO}}$ ,  $\Delta G^*_{\text{CHO}}$ ) of first four PCET steps in reaction pathway of  $\text{CO}_2\text{RR}$  along with the barrier for C1 and C2 pathway on the systems considered in this work. All units are in eV.

| Metal             | *COOH                                                                               | *CO                                                                                 | *2CO                                                                                | *COCOH                                                                               | *CHO                                                                                  |
|-------------------|-------------------------------------------------------------------------------------|-------------------------------------------------------------------------------------|-------------------------------------------------------------------------------------|--------------------------------------------------------------------------------------|---------------------------------------------------------------------------------------|
| Cu(111)           | 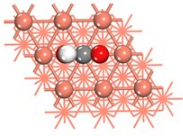   |    |    |    |    |
| $\text{Cu}_{13}$  |    |    |    |    |    |
| $\text{Cu}_{38}$  |   |   |   |   |   |
| $\text{Cu}_{55}$  |  |  |  |  |  |
| $\text{Cu}_{79}$  |  |  |  |  |  |
| $\text{Cu}_{140}$ |  |  |  |  |  |
| $\text{Cu}_{147}$ |  |  |  |  |  |

**Fig. S1** Optimized geometries of key intermediates adsorbed on the Cu (111) plane and  $\text{Cu}_n$  ( $n = 13, 38, 55, 79, 140$  and  $147$ ) clusters and the extended surfaces.

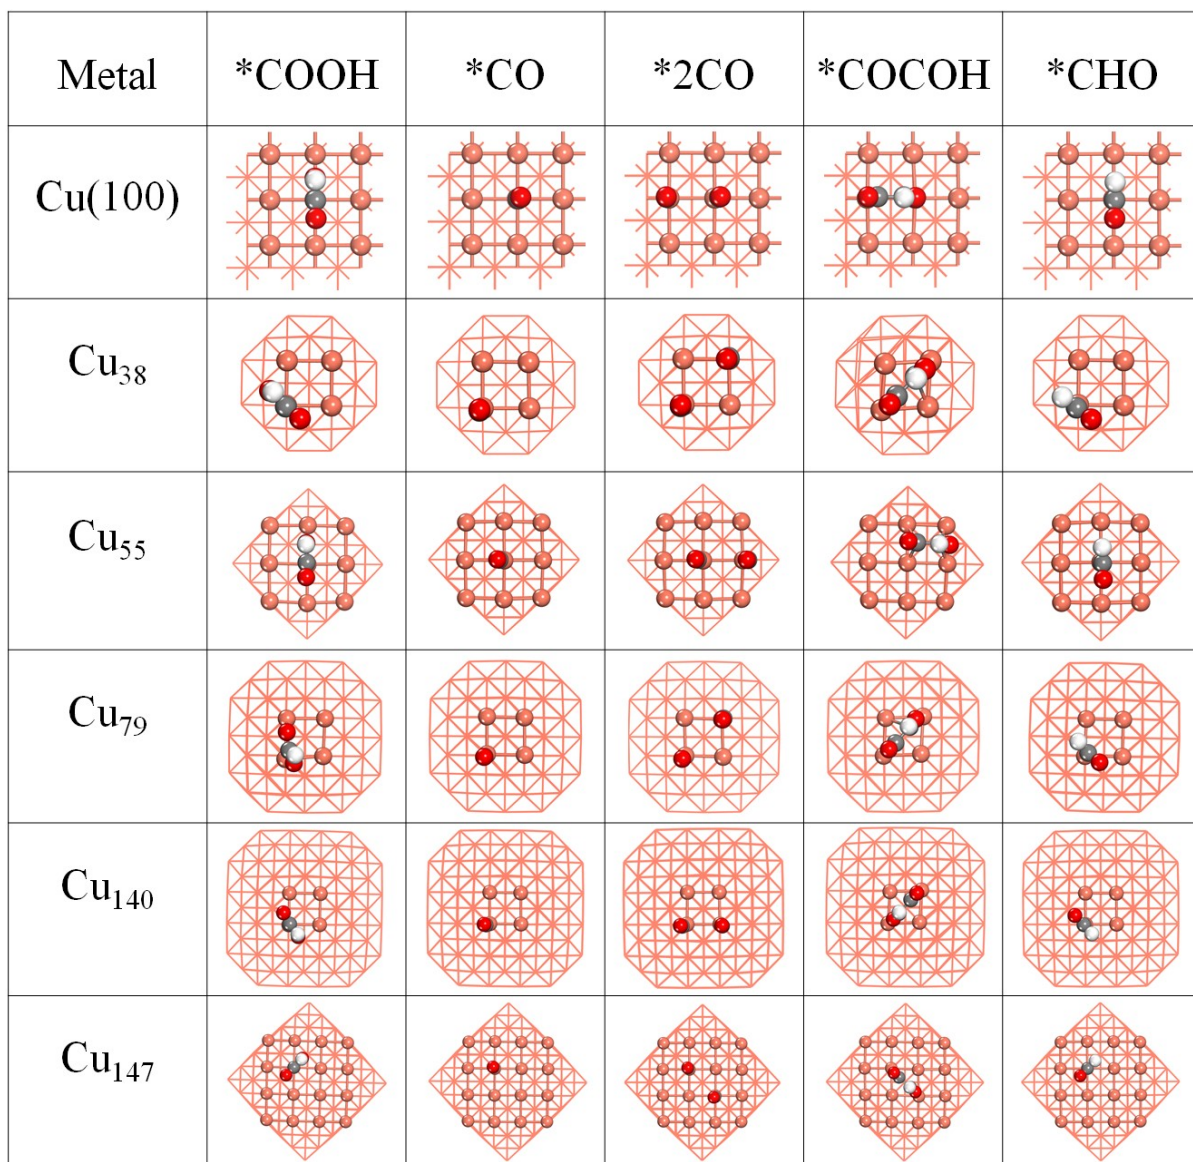

**Fig. S2** Optimized geometries of key intermediates adsorbed on the Cu (100) plane and Cu<sub>n</sub> (n = 13, 38, 55, 79, 140 and 147) clusters and the extended surfaces.



| Metal             | *H@(100)                                                                            | *H@(111)                                                                            | *H@(100)<br>Top site                                                                 | *H@(100)<br>Top site                                                                  |
|-------------------|-------------------------------------------------------------------------------------|-------------------------------------------------------------------------------------|--------------------------------------------------------------------------------------|---------------------------------------------------------------------------------------|
| Cu-plane          | 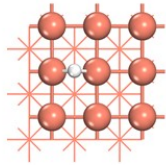   |    |    |    |
| Cu <sub>13</sub>  |    | --                                                                                  | --                                                                                   | --                                                                                    |
| Cu <sub>38</sub>  |    |    |    |    |
| Cu <sub>55</sub>  |   |   |   |   |
| Cu <sub>79</sub>  |  |  |  |  |
| Cu <sub>140</sub> |  |  |  |  |
| Cu <sub>147</sub> |  |  |  |  |

**Fig. S3** Optimized geometries of hydrogen atom adsorption on the bridge site and atop site of 100 and 111 plane of Copper nanoparticles.

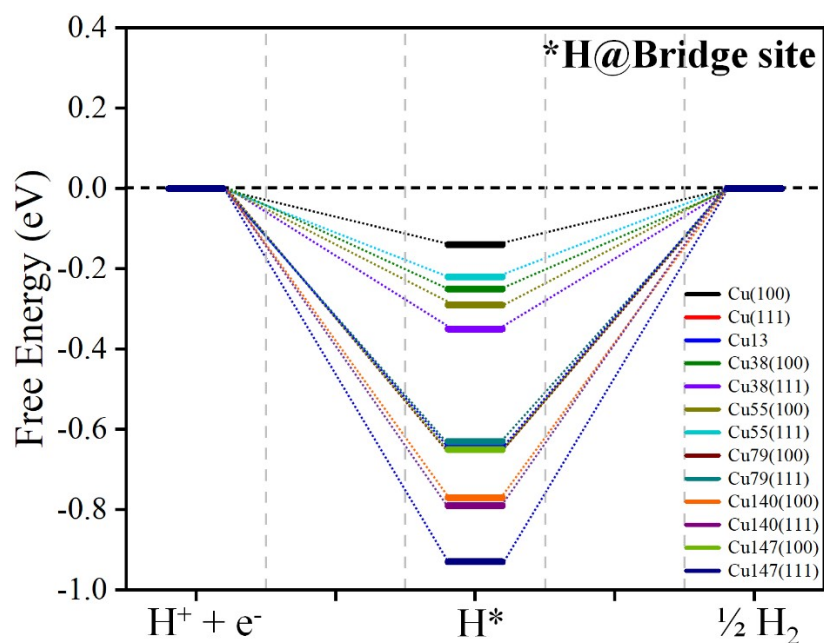

**Fig. S4** Free energy diagram of Hydrogen evolution reaction on bridge site of nanoparticle having different size and shape (see Figure S3 for sites and model structure). Units are in eV.

| Host Surface                                                                                                  | Nanoparticle Supported on Host Surface                                                                              |                                                                                                                       |                                                                                                                     |
|---------------------------------------------------------------------------------------------------------------|---------------------------------------------------------------------------------------------------------------------|-----------------------------------------------------------------------------------------------------------------------|---------------------------------------------------------------------------------------------------------------------|
| 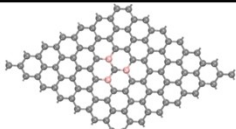<br><b>3B-Graphene(Gr)</b> | <br><b>Cu<sub>38</sub>/3BGr</b>  | <br><b>B-Graphene</b>             | <br><b>Cu<sub>79</sub>/BGr</b> |
| <br><b>DVG</b>             | <br><b>Cu<sub>38</sub>/DVG</b>   | <br><b>Cu<sub>79</sub>/DVG</b>    | <br><b>Cu<sub>55</sub>/DVG</b> |
| <br><b>BDVG</b>            | <br><b>Cu<sub>79</sub>/BDVG</b>  | <br><b>Cu<sub>147</sub>/BDVG</b>  |                                                                                                                     |
| <br><b>NDVG</b>            | <br><b>Cu<sub>55</sub>/NDVG</b>  |                                                                                                                       |                                                                                                                     |
| <br><b>2NDVG</b>           | <br><b>Cu<sub>55</sub>/2NDVG</b> | <br><b>Cu<sub>147</sub>/2NDVG</b> |                                                                                                                     |

**Fig. S5** Optimized structures of Copper nanoparticle (in blue color) anchored on host surface (in black color).

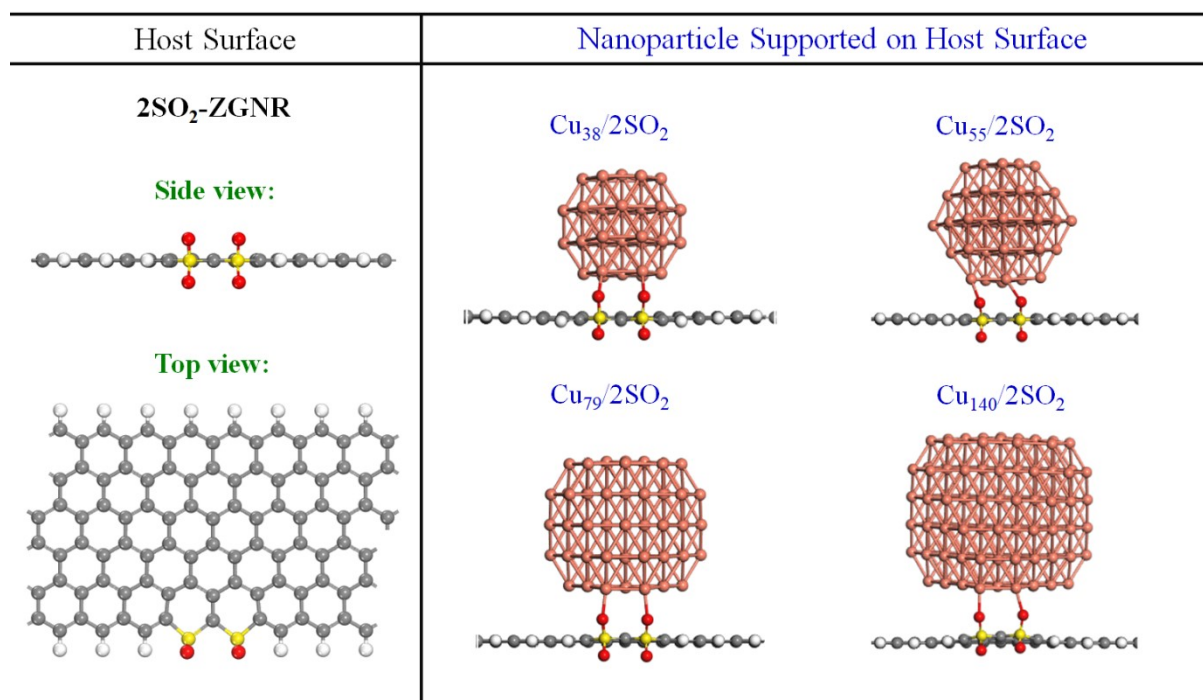

**Fig. S6** Optimized structures of Copper nanoparticle (in blue color) anchored on host surface (in black color) edge doped 2SO<sub>2</sub> graphene nanoribbon.

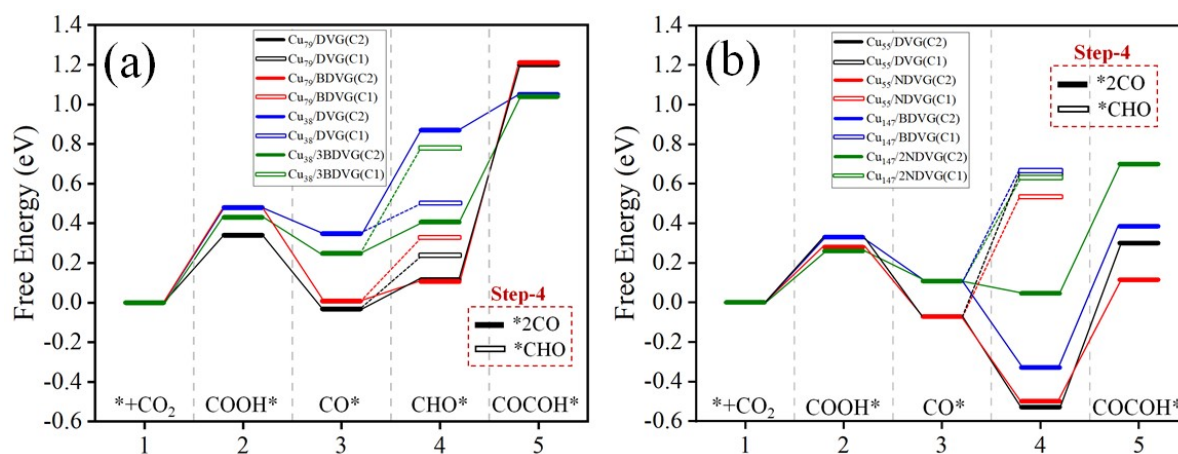

**Fig. S7** Free energy profiles (ΔG) of reaction pathway of CO<sub>2</sub>RR with the first four PCET steps and C-C coupling process (a). On 111 facet of Cu<sub>38</sub> and Cu<sub>79</sub> supported on heteroatom doped graphene (b). On 111 facet of Cu<sub>55</sub> and Cu<sub>147</sub> supported on heteroatom doped graphene.



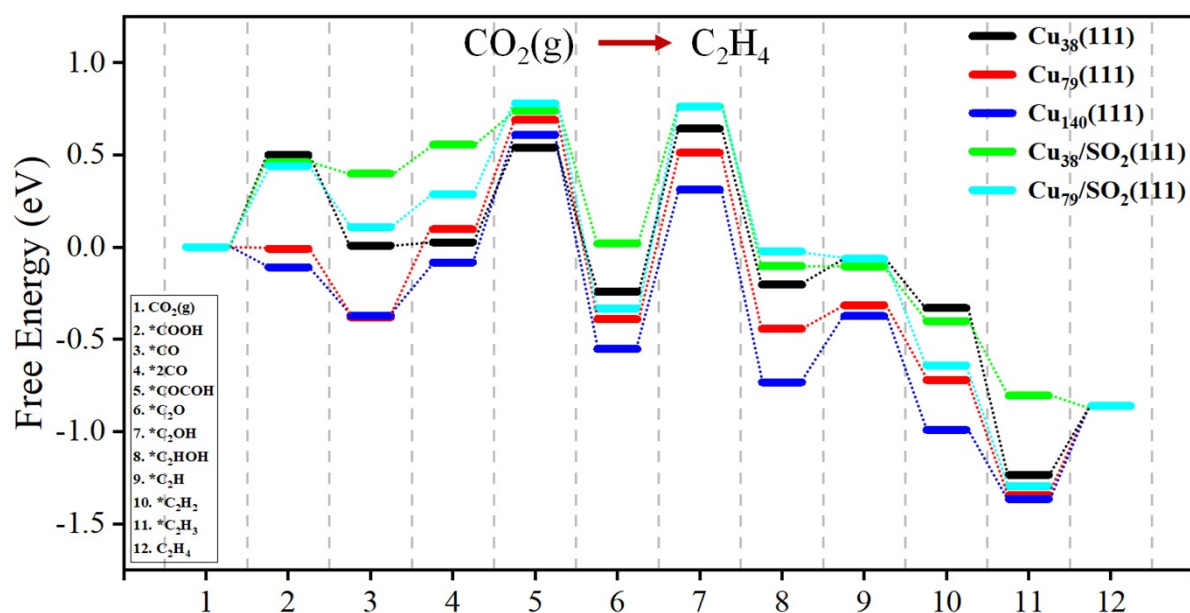

**Fig. S8** Free energy profiles ( $\Delta G$ ) of reaction pathway of  $\text{CO}_2\text{RR}$  to  $\text{C}_2\text{H}_4$  with  $^*\text{2CO}$ - $^*\text{COCO}$ H formation pathway on 111 facet of three selected nanoparticles ( $\text{Cu}_{38}$ ,  $\text{Cu}_{79}$ ,  $\text{Cu}_{140}$ ) and extended surface (2 $\text{SO}_2$  doped graphene nanoribbon) ( $\text{Cu}_{38}/\text{SO}_2$ ,  $\text{Cu}_{79}/\text{SO}_2$ ).

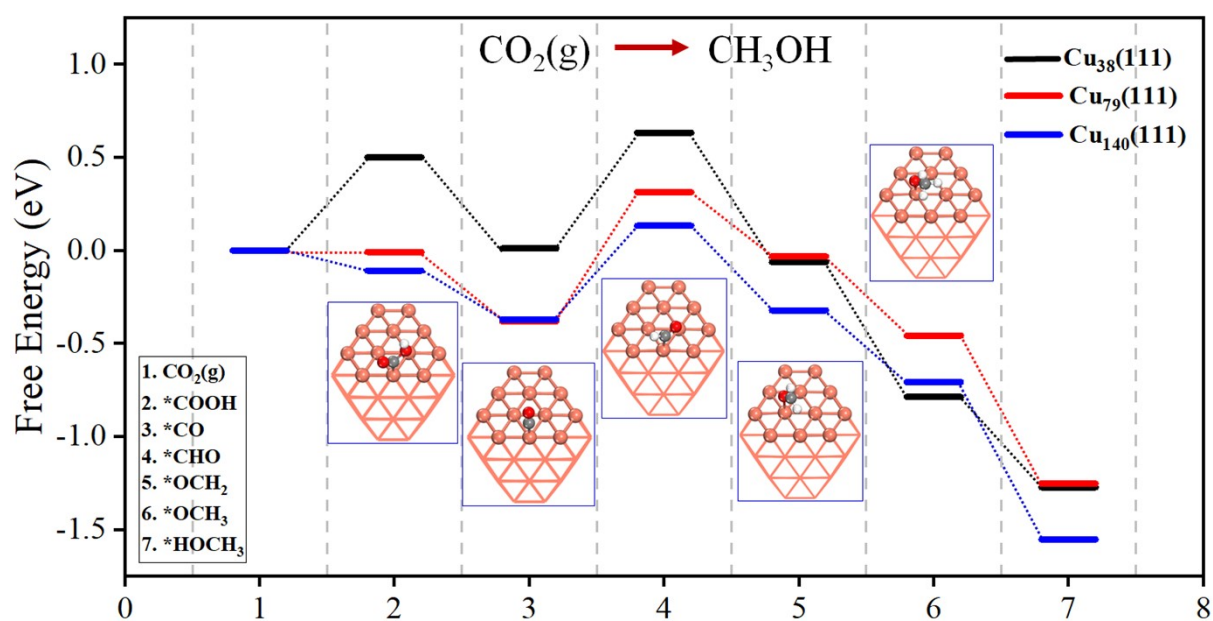

**Fig. S9** Free energy profiles ( $\Delta G$ ) of reaction pathway of  $\text{CO}_2\text{RR}$  to  $\text{CH}_3\text{OH}$  with  $^*\text{CO}$ - $^*\text{CHO}$  formation pathway on 111 facet of three selected nanoparticles ( $\text{Cu}_{38}$ ,  $\text{Cu}_{79}$ ,  $\text{Cu}_{140}$ ). An illustrative example of  $\text{Cu}_{79}$  of intermediate structures is shown in the inset.

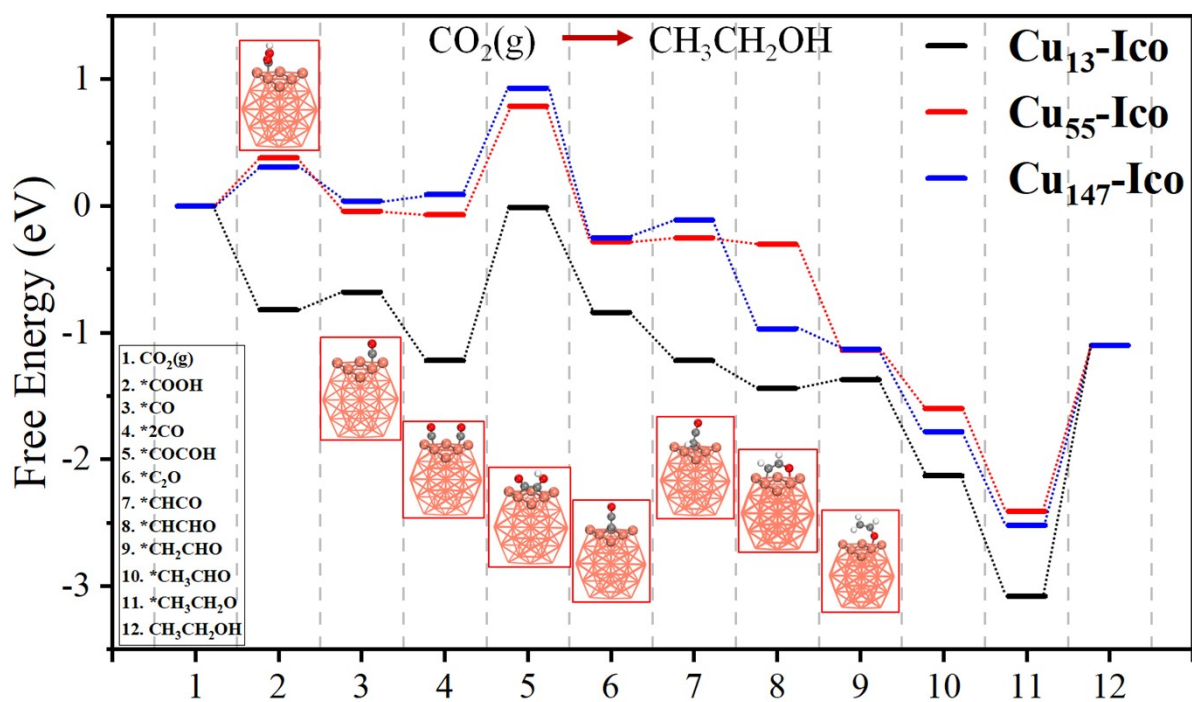

**Fig. S10** Free energy profiles ( $\Delta G$ ) of reaction pathway of CO<sub>2</sub>RR to C<sub>2</sub>H<sub>5</sub>OH with \*2CO-\*COCO formation pathway on 111 facet of Icosahedral nanoparticles (Cu<sub>13</sub>, Cu<sub>55</sub>, Cu<sub>147</sub>). An illustrative example of Cu<sub>55</sub> of intermediate structures is shown in the inset.



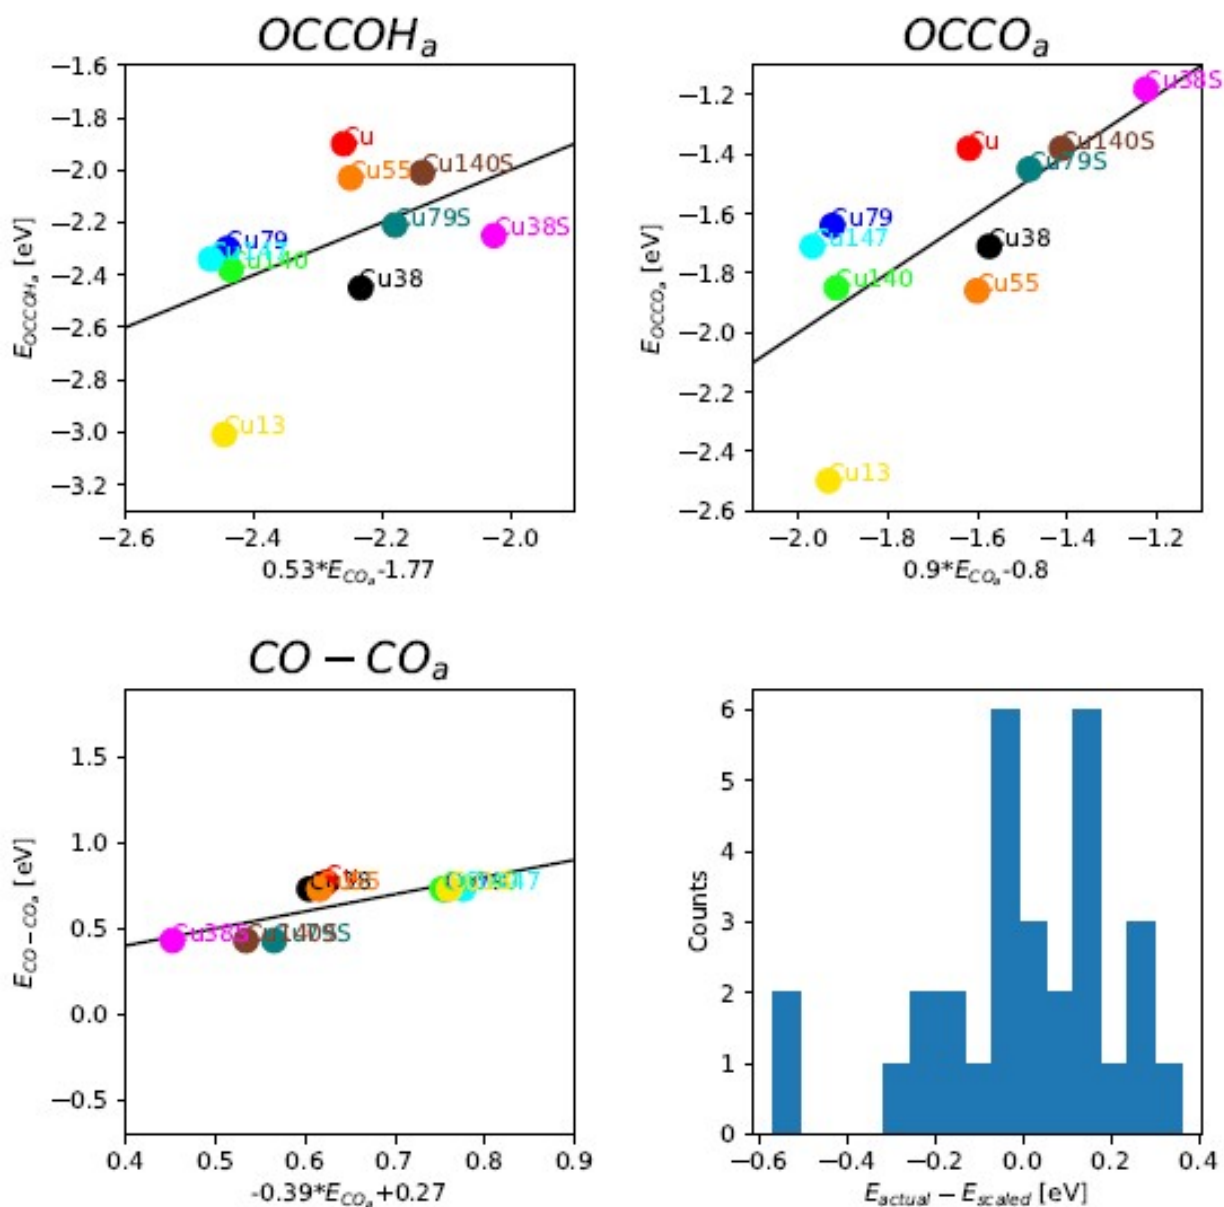

**Fig. S11** Scaling relations on the (111) surface of Cu nanoparticles between the binding energies of the intermediates versus the binding energies of the descriptors  $*CO$ .

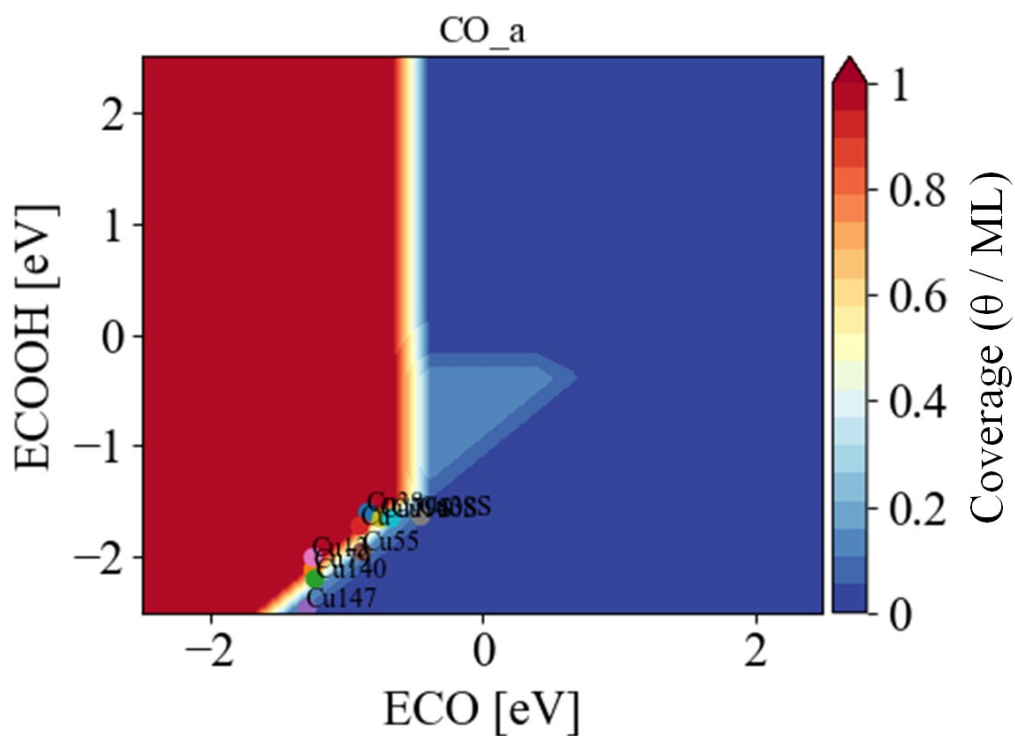

**Fig. S12** CO coverage map for Cu nanoparticles obtained using microkinetic model based on scaling relations.

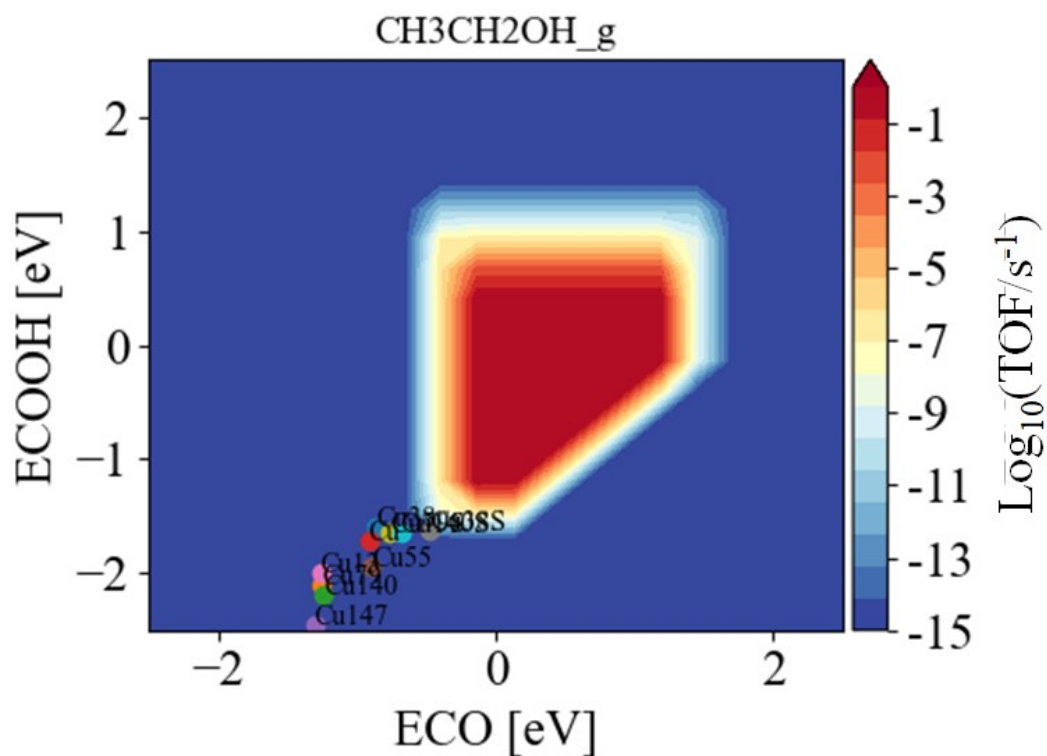

**Fig. S13** Activity volcano plot for Cu nanoparticles plotted using the binding energy of \*CO and \*COOH intermediate as the activity descriptors.
